# Supplementary material for: Analysis of mortality metrics associated with a comprehensive range of disorders in Denmark, 2000 to 2018: A population-based cohort study
Source: PubMed Central journal article supplement (PMC9202944; doi:10.1371/journal.pmed.1004023), 2022-06-16
Supplement: pmed.1004023.s005.pdf [file pmed.1004023.s005.pdf]

**S3 Table.** List of 39 selected conditions covering 10 broad categories of disorders.

| Category                            | Disorder                            | ICD-10 codes                                 |
|-------------------------------------|-------------------------------------|----------------------------------------------|
| <b>CIRCULATORY SYSTEM</b>           |                                     |                                              |
|                                     | Hypertension                        | I10-I13, I15                                 |
|                                     | Dyslipidemia                        | E78                                          |
|                                     | Ischemic heart disease              | I20-I25                                      |
|                                     | Atrial fibrillation                 | I48                                          |
|                                     | Heart failure                       | I50                                          |
|                                     | Peripheral artery occlusive disease | I70-I74                                      |
|                                     | Stroke                              | I60-I64, I69                                 |
| <b>ENDOCRINE SYSTEM</b>             |                                     |                                              |
|                                     | Diabetes mellitus                   | E10-E14                                      |
|                                     | Thyroid disorder                    | E00-E05, E06.1-E06.9, E07                    |
|                                     | Gout                                | E79, M10                                     |
| <b>PULMONARY SYSTEM AND ALLERGY</b> |                                     |                                              |
|                                     | Chronic pulmonary disease           | J40-J47                                      |
|                                     | Allergy                             | J30.1-J30.4, L23, L50.0, T78.0, T78.2, T78.4 |
| <b>GASTROINTESTINAL SYSTEM</b>      |                                     |                                              |
|                                     | Ulcer/chronic gastritis             | K22.1, K25-K28, K29.3-K29.5                  |
|                                     | Chronic liver disease               | B16-B19, K70, K74, K76.6, I85                |
|                                     | Inflammatory bowel disease          | K50-K51                                      |
|                                     | Diverticular disease of intestine   | K57                                          |
| <b>UROGENITAL SYSTEM</b>            |                                     |                                              |
|                                     | Chronic kidney disease              | N03, N11, N18-N19                            |
|                                     | Prostate disorders                  | N40                                          |
| <b>MUSCULOSKELETAL SYSTEM</b>       |                                     |                                              |
|                                     | Connective tissue disorders         | M05-M06, M08-M09, M30-M36, D86               |
|                                     | Osteoporosis                        | M80-M82                                      |
| <b>HEMATOLOGICAL SYSTEM</b>         |                                     |                                              |
|                                     | HIV/AIDS                            | B20-B24                                      |
|                                     | Anemias                             | D50-D53, D55-D59, D60-D61, D63-D64           |
| <b>CANCERS</b>                      |                                     |                                              |
|                                     | Cancers                             | C00-C43, C45-C97                             |
| <b>NEUROLOGICAL SYSTEM</b>          |                                     |                                              |
|                                     | Vision problem                      | H40, H25, H54                                |
|                                     | Hearing problem                     | H90-H91, H93.1                               |
|                                     | Migraine                            | G43                                          |
|                                     | Epilepsy                            | G40-G41                                      |
|                                     | Parkinson's disease                 | G20-G22                                      |
|                                     | Multiple sclerosis                  | G35                                          |
|                                     | Neuropathies                        | G50-G64                                      |
| <b>MENTAL DISORDERS</b>             |                                     |                                              |
|                                     | Mental disorders                    | F00-F99                                      |
