# Supplementary material for: Analysis of mortality metrics associated with a comprehensive range of disorders in Denmark, 2000 to 2018: A population-based cohort study
Source: PubMed Central journal article supplement (PMC9202944; doi:10.1371/journal.pmed.1004023), 2022-06-16
Supplement: pmed.1004023.s006.pdf [file pmed.1004023.s006.pdf]

## Analysis of mortality metrics associated with a comprehensive range of disorders in Denmark, 2000-2018: A population-based cohort study (Supporting information – S4 Table)

S4 Table. For 39 selected conditions covering 10 broad categories: Number of diagnosed, age at diagnosis (median and interquartile range), number of deaths among the diagnosed, age at death (median and interquartile range), Mortality Rate Ratios (MRR; with 95% confidence interval) and Life Years Lost (LYL; with 95% confidence interval) for all causes of death. Estimates are not shown if they are based on less than 100 individuals diagnosed or less than 20 deaths; for Life Years Lost, estimates are not shown if there were not enough individuals at older ages of follow-up.

| Disorder                            | N         | Age at diagnosis | Deaths  | Age at death     | MRR           | LYL              |
|-------------------------------------|-----------|------------------|---------|------------------|---------------|------------------|
| Circulatory system                  | 1,431,041 | 66.6 (55.5-76.6) | 629,860 | 81.6 (73.3-88.0) | 2.9 (2.9-2.9) | 3.8 (3.8-3.8)    |
| Hypertension                        | 777,878   | 67.5 (57.0-76.9) | 298,758 | 81.6 (73.4-88.0) | 1.8 (1.7-1.8) | 2.9 (2.8-2.9)    |
| Dislipidemia                        | 280,111   | 64.7 (55.4-73.3) | 84,211  | 78.4 (70.8-84.9) | 1.4 (1.4-1.4) | 2.1 (2.1-2.2)    |
| Ischemic heart disease              | 503,434   | 67.8 (57.4-77.3) | 250,857 | 81.7 (74.1-87.8) | 1.9 (1.9-1.9) | 3.7 (3.6-3.7)    |
| Atrial fibrillation                 | 362,525   | 74.5 (65.3-82.3) | 205,105 | 83.7 (76.8-89.3) | 2.3 (2.2-2.3) | 4.2 (4.1-4.2)    |
| Heart failure                       | 251,887   | 76.2 (66.9-83.7) | 183,015 | 82.8 (75.5-88.7) | 3.3 (3.3-3.3) | 6.5 (6.4-6.5)    |
| Peripheral artery occlusive disease | 225,408   | 70.3 (61.0-78.2) | 127,307 | 79.9 (72.7-86.1) | 2.6 (2.6-2.6) | 6.1 (6.0-6.1)    |
| Stroke                              | 358,431   | 72.4 (61.2-81.1) | 217,881 | 82.0 (74.1-88.0) | 2.8 (2.8-2.8) | 6.2 (6.2-6.2)    |
| Endocrine system                    | 605,203   | 60.5 (46.9-72.6) | 211,165 | 79.6 (70.8-86.5) | 2.0 (2.0-2.0) | 4.7 (4.6-4.7)    |
| Diabetes Mellitus                   | 332,189   | 63.5 (51.7-73.9) | 145,684 | 78.2 (69.6-85.2) | 2.3 (2.3-2.3) | 6.1 (6.1-6.2)    |
| Thyroid disorder                    | 265,551   | 55.8 (41.8-70.5) | 64,201  | 82.2 (74.1-88.3) | 1.5 (1.4-1.5) | 2.4 (2.4-2.5)    |
| Gout                                | 54,039    | 67.2 (54.0-77.9) | 22,715  | 81.0 (72.7-87.5) | 2.0 (2.0-2.0) | 4.7 (4.6-4.8)    |
| Pulmonary system and allergy        | 690,345   | 50.7 (19.6-69.4) | 202,644 | 78.6 (70.9-84.9) | 2.7 (2.7-2.8) | 7.5 (7.5-7.6)    |
| Chronic pulmonary disease           | 568,030   | 55.7 (18.7-71.7) | 194,280 | 78.7 (71.2-84.9) | 2.9 (2.9-3.0) | 8.3 (8.2-8.3)    |
| Allergy                             | 170,739   | 34.0 (18.1-50.7) | 12,400  | 74.5 (63.7-84.0) | 1.1 (1.1-1.1) | 0.3 (0.1-0.5)    |
| Gastrointestinal system             | 474,333   | 63.0 (49.0-74.6) | 186,028 | 79.5 (68.9-87.0) | 2.0 (2.0-2.1) | 6.0 (6.0-6.1)    |
| Ulcer/chronic gastritis             | 194,212   | 67.3 (53.3-78.3) | 104,338 | 80.7 (71.5-87.5) | 2.2 (2.2-2.3) | 6.6 (6.5-6.6)    |
| Chronic liver disease               | 70,295    | 53.8 (42.8-63.6) | 35,935  | 63.1 (55.0-71.5) | 7.8 (7.8-7.9) | 17.1 (17.0-17.1) |
| Inflammatory bowel disease          | 75,207    | 43.3 (28.3-60.5) | 13,199  | 78.0 (68.1-85.0) | 1.5 (1.4-1.5) | 3.2 (3.1-3.4)    |
| Diverticular disease of intestine   | 180,017   | 68.5 (58.7-76.9) | 56,676  | 83.5 (76.5-89.1) | 1.2 (1.2-1.2) | 1.3 (1.2-1.3)    |
| Urogenital system                   | 255,126   | 71.1 (61.9-79.0) | 139,466 | 81.7 (74.5-87.4) | 1.9 (1.8-1.9) | 4.5 (4.4-4.5)    |
| Chronic kidney disease              | 119,289   | 72.8 (59.3-81.6) | 71,125  | 80.2 (71.6-86.6) | 4.2 (4.1-4.2) | 9.5 (9.5-9.6)    |
| Prostate disorders                  | 150,437   | 70.9 (63.5-77.9) | 79,099  | 83.0 (77.1-88.1) | 1.2 (1.2-1.2) | 0.8 (0.7-0.8)    |
| Musculoskeletal system              | 395,014   | 67.0 (53.9-77.0) | 148,073 | 81.7 (73.3-88.1) | 1.9 (1.8-1.9) | 4.4 (4.3-4.4)    |
| Connective tissue disorders         | 177,308   | 58.7 (39.5-72.2) | 51,389  | 81.2 (73.2-87.3) | 1.5 (1.5-1.5) | 3.3 (3.2-3.4)    |
| Osteoporosis                        | 246,366   | 71.4 (62.0-79.9) | 109,978 | 82.1 (73.7-88.5) | 2.0 (2.0-2.0) | 4.5 (4.4-4.5)    |
| Hematological system                | 282,890   | 72.8 (56.8-82.4) | 174,735 | 81.4 (71.9-88.2) | 3.8 (3.8-3.8) | 9.7 (9.6-9.7)    |
| HIV/AIDS                            | 6,531     | 37.9 (30.9-46.9) | 1,222   | 53.5 (44.8-63.9) | 3.7 (3.5-3.9) | -                |
| Anemias                             | 276,971   | 73.2 (58.3-82.5) | 173,777 | 81.5 (72.1-88.2) | 3.8 (3.8-3.8) | 9.6 (9.5-9.6)    |
| Cancers                             | 640,038   | 67.7 (57.7-76.2) | 364,443 | 75.5 (66.5-83.3) | 4.9 (4.9-5.0) | 9.9 (9.9-9.9)    |
| Neurological system                 | 1,283,880 | 64.8 (47.8-75.6) | 442,749 | 83.7 (75.7-89.7) | 1.2 (1.2-1.2) | 1.7 (1.7-1.8)    |
| Vision problem                      | 511,549   | 74.5 (67.2-80.6) | 235,433 | 85.5 (79.3-90.6) | 1.1 (1.1-1.1) | 0.8 (0.8-0.9)    |
| Hearing problem                     | 477,430   | 69.3 (56.3-78.3) | 202,206 | 86.3 (79.7-91.4) | 0.9 (0.9-0.9) | -0.1 (-0.1--0.1) |
| Migraine                            | 81,142    | 36.4 (22.9-48.6) | 4,077   | 70.5 (58.4-81.7) | 1.0 (1.0-1.0) | -0.6 (-0.9--0.4) |
| Epilepsy                            | 118,527   | 45.2 (19.4-65.7) | 40,944  | 72.5 (60.3-82.2) | 3.4 (3.3-3.4) | 13.5 (13.4-13.6) |
| Parkinson's disease                 | 31,465    | 74.9 (67.6-80.9) | 20,844  | 81.8 (76.4-86.6) | 2.7 (2.7-2.7) | 5.5 (5.4-5.5)    |
| Multiple sclerosis                  | 20,917    | 44.3 (34.4-53.9) | 4,612   | 66.8 (57.9-75.4) | 2.8 (2.7-2.9) | 8.8 (8.5-9.0)    |
| Neuropathies                        | 317,936   | 53.8 (41.6-66.5) | 60,165  | 76.8 (66.3-85.6) | 1.3 (1.3-1.3) | 2.0 (1.9-2.0)    |
| Mental disorders                    | 1,128,977 | 41.4 (21.6-65.6) | 318,197 | 80.2 (67.5-87.7) | 3.4 (3.3-3.4) | 9.5 (9.5-9.5)    |
