# Supplementary material for: Analysis of mortality metrics associated with a comprehensive range of disorders in Denmark, 2000 to 2018: A population-based cohort study
Source: PubMed Central journal article supplement (PMC9202944; doi:10.1371/journal.pmed.1004023), 2022-06-16
Supplement: pmed.1004023.s007.pdf [file pmed.1004023.s007.pdf]

## Analysis of mortality metrics associated with a comprehensive range of disorders in Denmark, 2000-2018: A population-based cohort study (Supporting information – S5 Table)

S5 Table. Mortality rate ratios for all causes of death for 39 selected conditions covering 10 broad categories with and without adjustment for air pollution during the year before start of follow-up. All estimates are adjusted for age, sex and birth date.

| Disorder                            | Mortality Rate Ratios |               |
|-------------------------------------|-----------------------|---------------|
|                                     | Not adjusted          | Adjusted      |
| Circulatory system                  | 2.9 (2.9-2.9)         | 2.9 (2.9-2.9) |
| Hypertension                        | 1.8 (1.7-1.8)         | 1.8 (1.7-1.8) |
| Dislipidemia                        | 1.4 (1.4-1.4)         | 1.4 (1.4-1.4) |
| Ischemic heart disease              | 1.9 (1.9-1.9)         | 1.9 (1.9-1.9) |
| Atrial fibrillation                 | 2.3 (2.2-2.3)         | 2.3 (2.2-2.3) |
| Heart failure                       | 3.3 (3.3-3.3)         | 3.3 (3.3-3.3) |
| Peripheral artery occlusive disease | 2.6 (2.6-2.6)         | 2.6 (2.6-2.6) |
| Stroke                              | 2.8 (2.8-2.8)         | 2.8 (2.8-2.8) |
| Endocrine system                    | 2.0 (2.0-2.0)         | 2.0 (2.0-2.0) |
| Diabetes Mellitus                   | 2.3 (2.3-2.3)         | 2.3 (2.3-2.3) |
| Thyroid disorder                    | 1.5 (1.4-1.5)         | 1.5 (1.4-1.5) |
| Gout                                | 2.0 (2.0-2.0)         | 2.0 (2.0-2.0) |
| Pulmonary system and allergy        | 2.7 (2.7-2.8)         | 2.7 (2.7-2.7) |
| Chronic pulmonary disease           | 2.9 (2.9-3.0)         | 2.9 (2.9-2.9) |
| Allergy                             | 1.1 (1.1-1.1)         | 1.1 (1.1-1.1) |
| Gastrointestinal system             | 2.0 (2.0-2.1)         | 2.0 (2.0-2.1) |
| Ulcer/chronic gastritis             | 2.2 (2.2-2.3)         | 2.2 (2.2-2.3) |
| Chronic liver disease               | 7.8 (7.8-7.9)         | 7.8 (7.7-7.8) |
| Inflamatory bowel disease           | 1.5 (1.4-1.5)         | 1.5 (1.4-1.5) |
| Diverticular disease of intestine   | 1.2 (1.2-1.2)         | 1.2 (1.2-1.2) |
| Urogenital system                   | 1.9 (1.8-1.9)         | 1.9 (1.8-1.9) |
| Chronic kidney disease              | 4.2 (4.1-4.2)         | 4.1 (4.1-4.2) |
| Prostate disorders                  | 1.2 (1.2-1.2)         | 1.2 (1.2-1.2) |
| Musculoskeletal system              | 1.9 (1.8-1.9)         | 1.8 (1.8-1.9) |
| Connective tissue disorders         | 1.5 (1.5-1.5)         | 1.5 (1.5-1.5) |
| Osteoporosis                        | 2.0 (2.0-2.0)         | 2.0 (2.0-2.0) |
| Hematological system                | 3.8 (3.8-3.8)         | 3.8 (3.8-3.8) |
| HIV/AIDS                            | 3.7 (3.5-3.9)         | 3.5 (3.3-3.7) |
| Anemias                             | 3.8 (3.8-3.8)         | 3.8 (3.8-3.8) |
| Cancers                             | 4.9 (4.9-4.9)         | 4.9 (4.9-4.9) |
| Neurological system                 | 1.2 (1.2-1.2)         | 1.2 (1.2-1.2) |
| Vision problem                      | 1.1 (1.1-1.1)         | 1.1 (1.1-1.1) |
| Hearing problem                     | 0.9 (0.9-0.9)         | 0.9 (0.9-0.9) |
| Migraine                            | 1.0 (1.0-1.0)         | 1.0 (1.0-1.0) |
| Epilepsy                            | 3.4 (3.3-3.4)         | 3.3 (3.3-3.4) |
| Parkinson's disease                 | 2.7 (2.7-2.7)         | 2.7 (2.7-2.7) |
| Multiple sclerosis                  | 2.8 (2.7-2.9)         | 2.8 (2.7-2.9) |
| Neuropathies                        | 1.3 (1.3-1.3)         | 1.3 (1.3-1.3) |
| Mental disorders                    | 3.4 (3.3-3.4)         | 3.4 (3.3-3.4) |
