# Supplementary material for: Analysis of mortality metrics associated with a comprehensive range of disorders in Denmark, 2000 to 2018: A population-based cohort study
Source: PubMed Central journal article supplement (PMC9202944; doi:10.1371/journal.pmed.1004023), 2022-06-16
Supplement: pmed.1004023.s010.pdf [file pmed.1004023.s010.pdf]

# The Danish Atlas of Disease Mortality

Analysis of mortality metrics associated with a comprehensive range of disorders in Denmark, 2000-2018

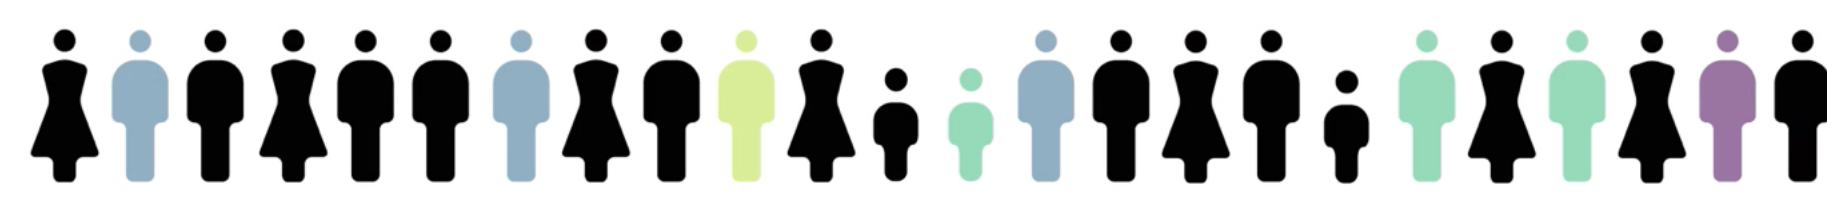

ICD-10 Chapters All ICD-10 disorders Selected disorders

Mental disorders

To search for another disorder, click the dropdown above, then press **Backspace** (**Delete** on Mac), then enter the disorder.

## Summary statement

A total of 1,128,977  living in Denmark in 2000-2018 were diagnosed for the first time with 'Mental disorders' (ICD-10: F00-F99) in a hospital in 1995-2018. The median age at diagnosis was 41.4 years, while 25% of the diagnosed were younger than 21.6 and 25% were older than 65.6 years at time of diagnosis. Among the diagnosed, 318,197 persons died in 2000-2018, and the median age at time of death was 80.2 years (25% were younger than 67.5 years and 25% were older than 87.7 years). On average, mortality rates were 3.35 times higher among the diagnosed compared to those of same age and sex without that diagnosis (MRR = 3.35 (95% CI: 3.34, 3.37)), and the average reduction in life expectancy after diagnosis was 9.50 years compared to the entire Danish population of same age and sex (LYL = 9.50 (95% CI: 9.46, 9.54)).

**Note:** The estimate of life expectancy is based on the assumption that the diagnosed will experience the mortality rates of the diagnosed during the entire life (after diagnosis), which might be plausible for chronic disorders but not for acute ones.

## Summaries split by sex

| Sex     | Diagnosed | Age at Diagnosis [Median (IQR)] | Deaths  | Age at Death [Median (IQR)] | Mortality Rate Ratio | Life Years Lost       |
|---------|-----------|---------------------------------|---------|-----------------------------|----------------------|-----------------------|
| Persons | 1,128,977 | 41.4 (21.6 - 65.6)              | 318,197 | 80.2 (67.5 - 87.7)          | 3.35 (3.34 - 3.37)   | 9.50 (9.46 - 9.54)    |
| Men     | 537,389   | 39.7 (20.1 - 61.3)              | 151,281 | 75.2 (62.2 - 84.3)          | 3.85 (3.83 - 3.87)   | 10.79 (10.72 - 10.85) |
| Women   | 591,588   | 43.0 (23.0 - 70.4)              | 166,916 | 83.8 (73.9 - 89.8)          | 2.95 (2.93 - 2.97)   | 8.33 (8.27 - 8.39)    |

## Age at diagnosis

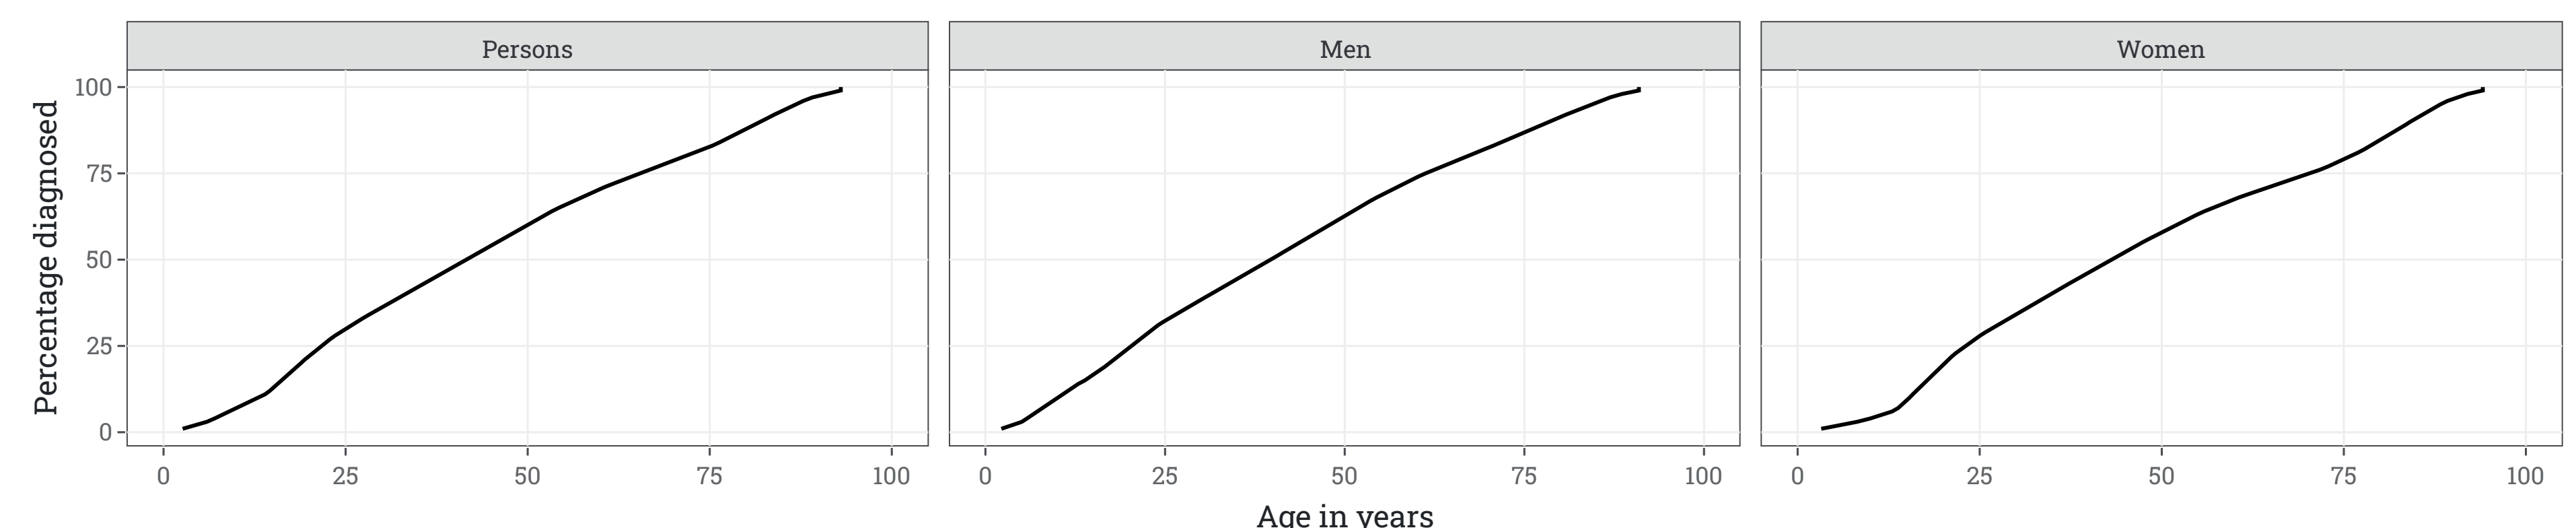

## Age at death

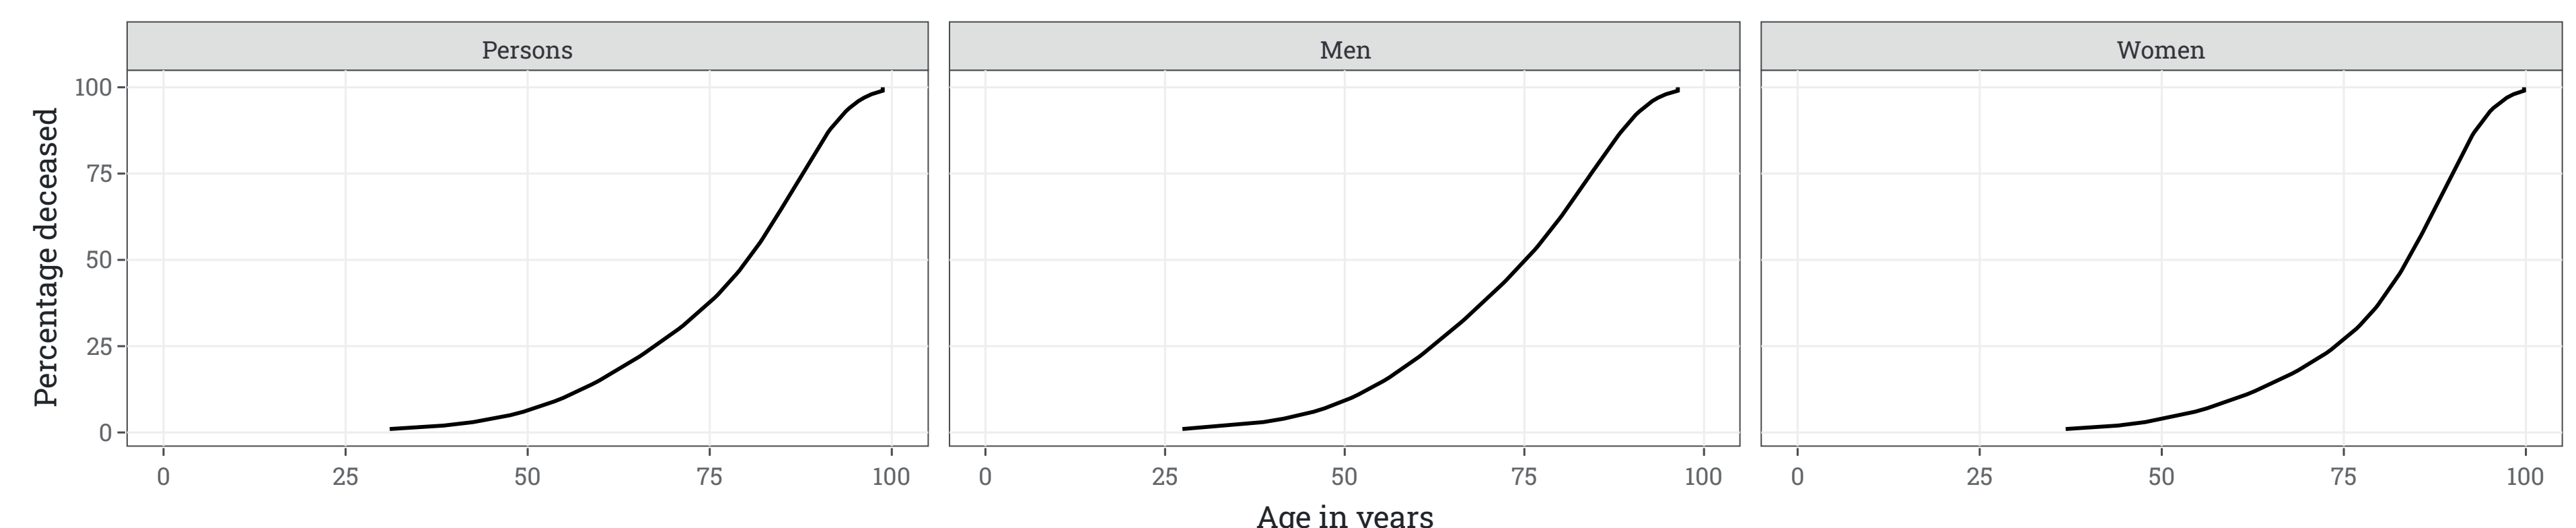

## Incidence rate given age

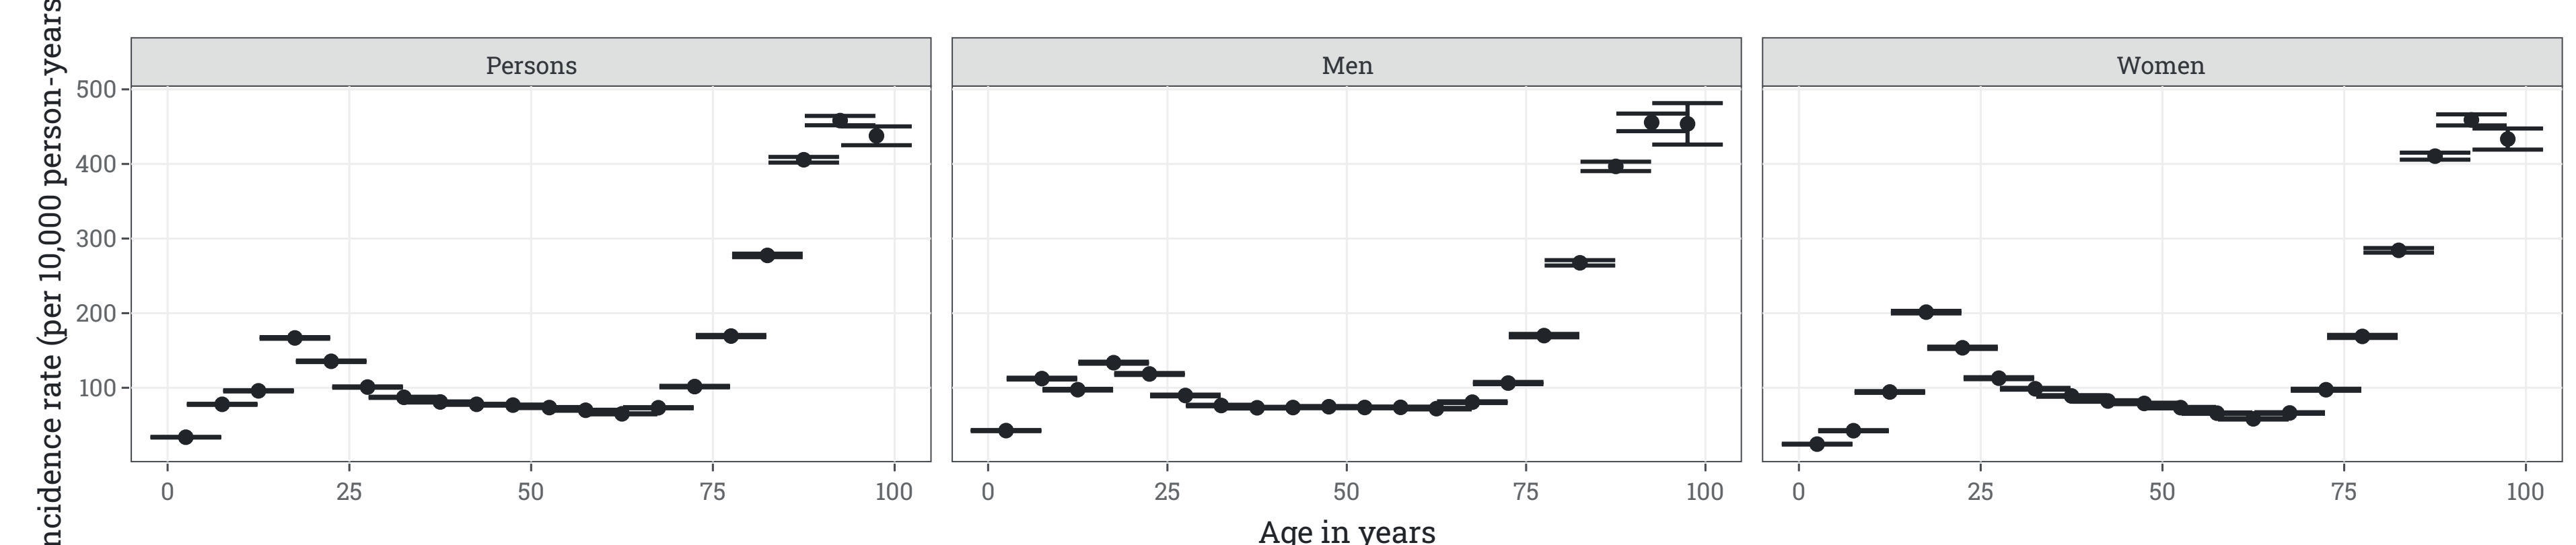

Click on a point for more information

## Mortality rates and mortality rate ratio given age

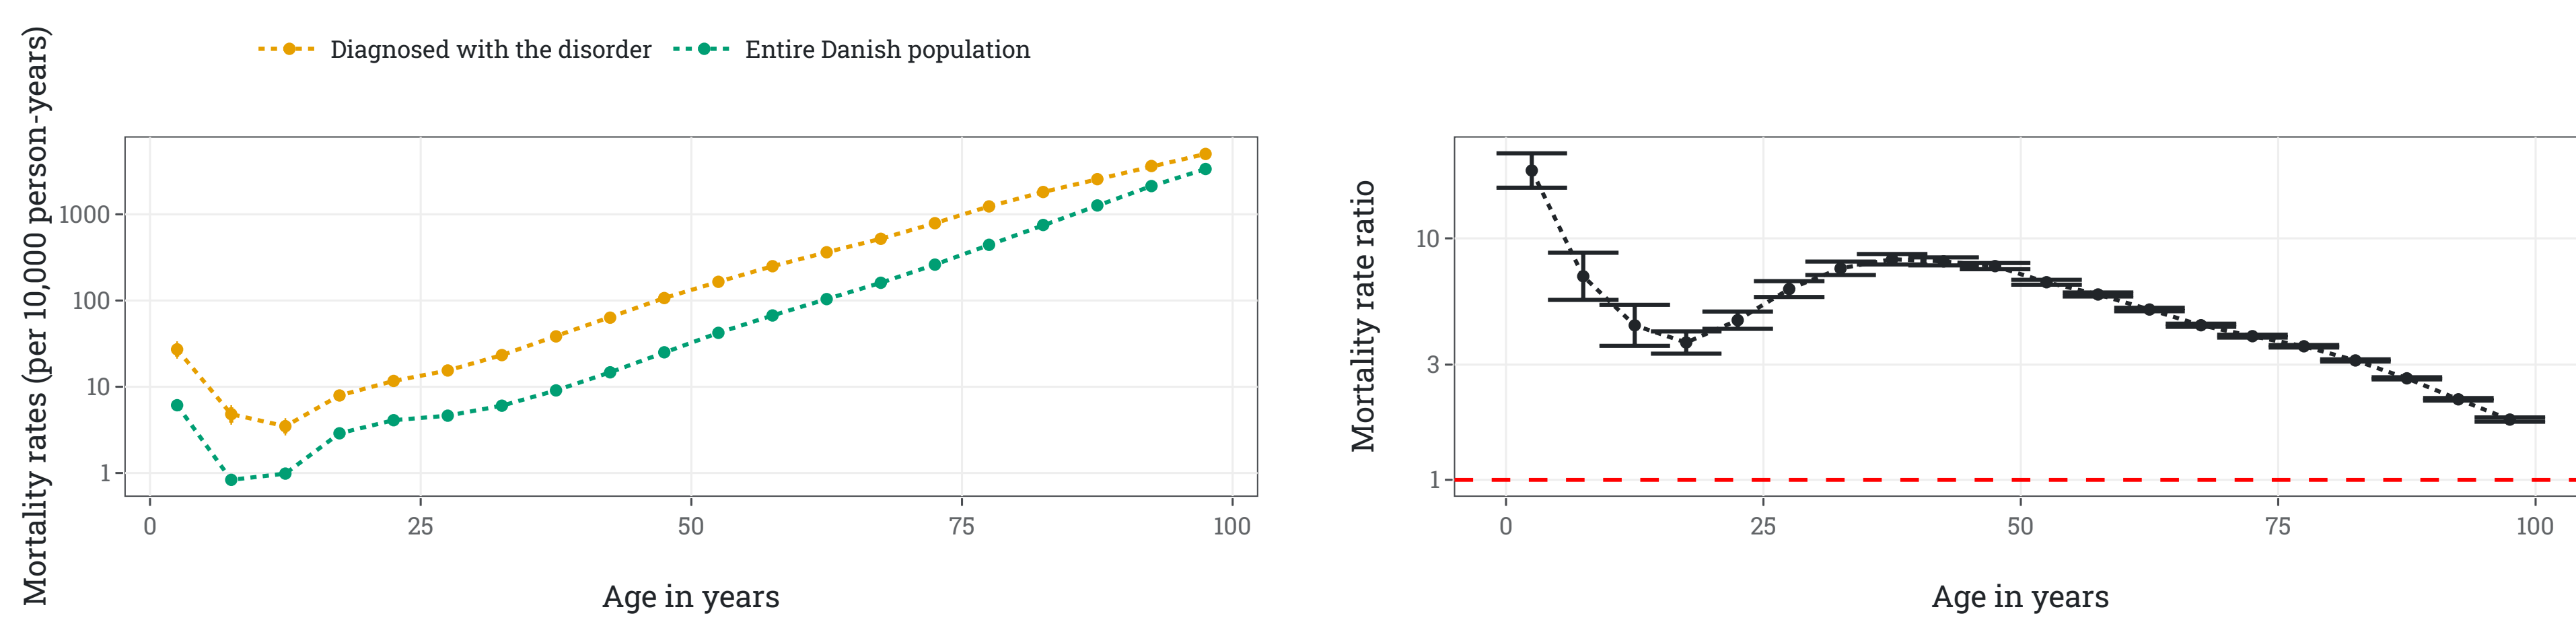

Click on a point for more information

## Mortality rate ratio given time since diagnosis

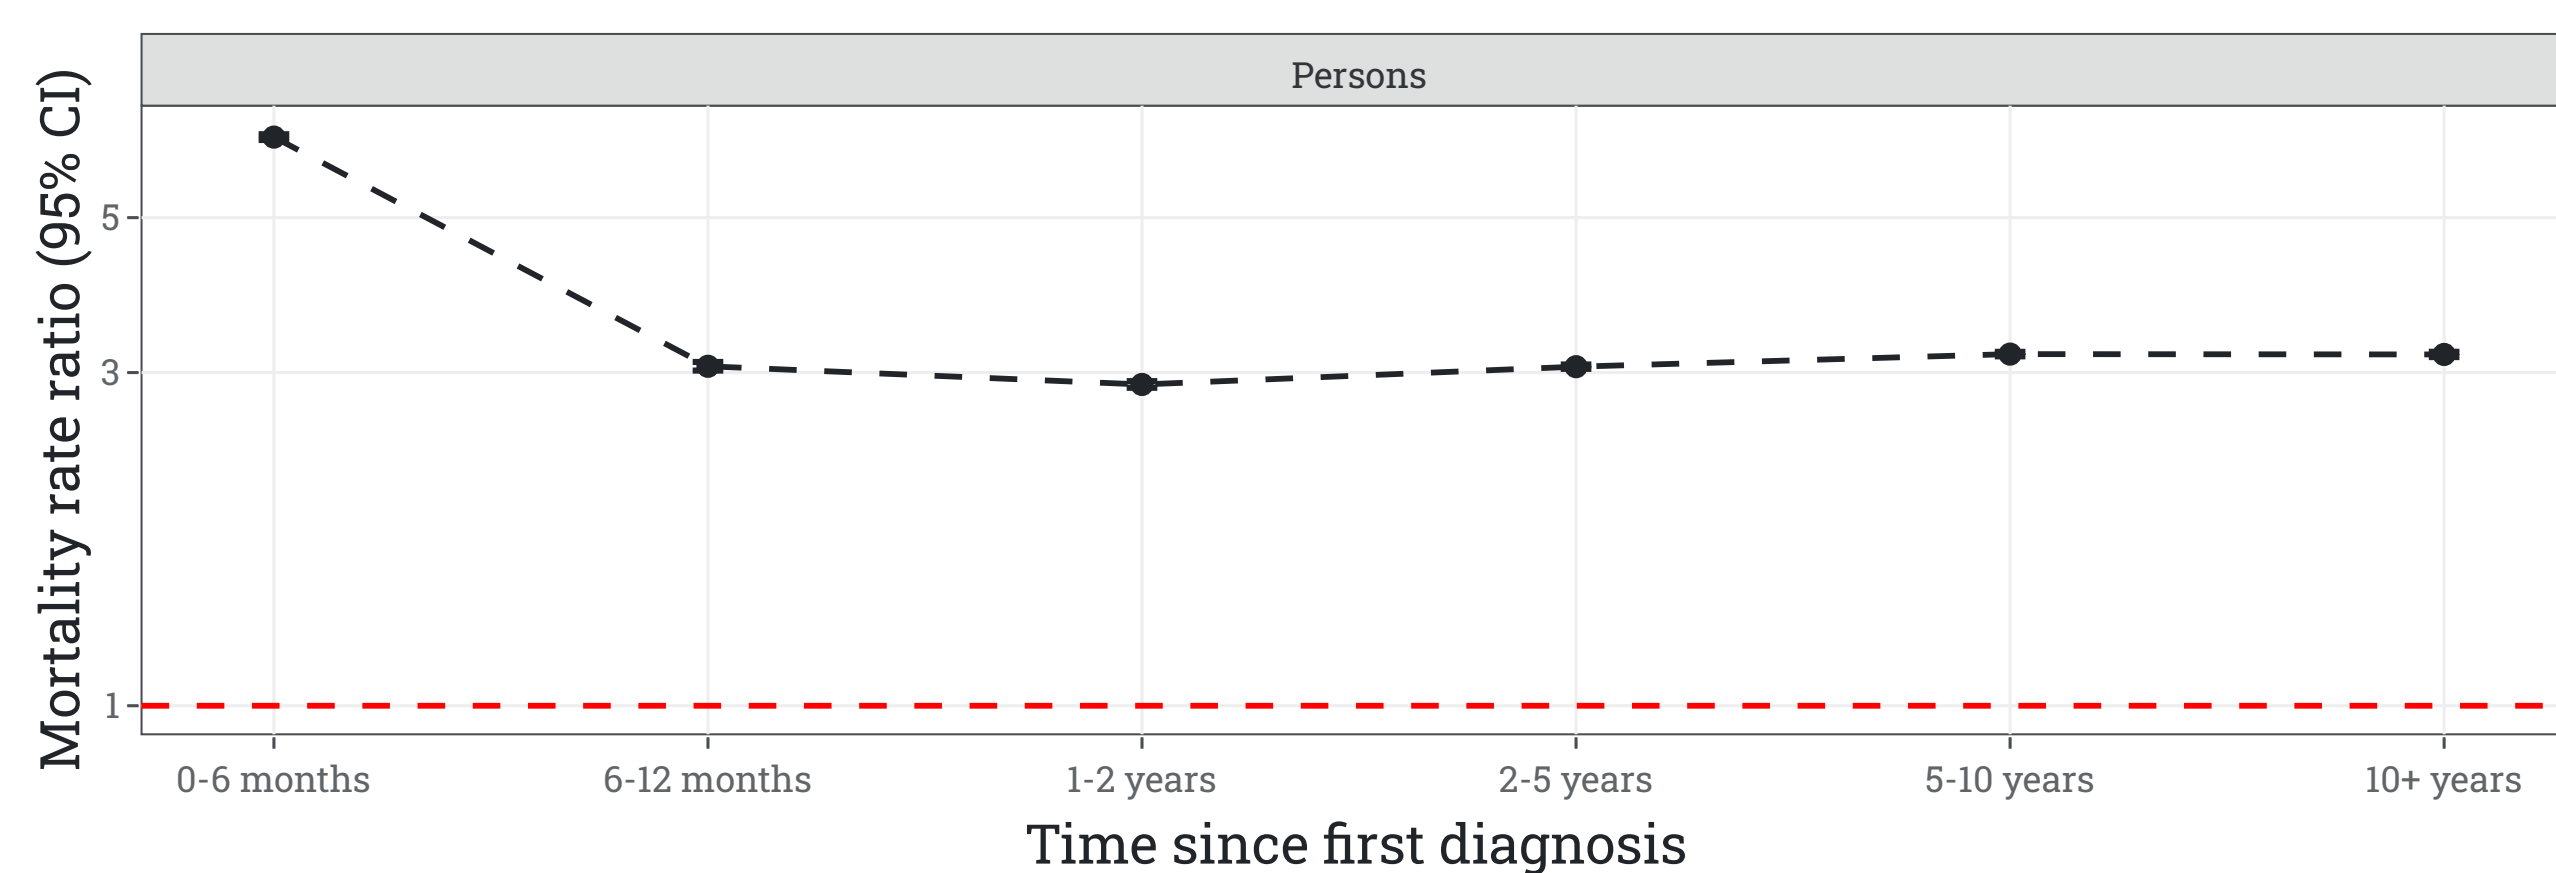

Click on a point for more information

## Expected remaining life expectancy at a given age

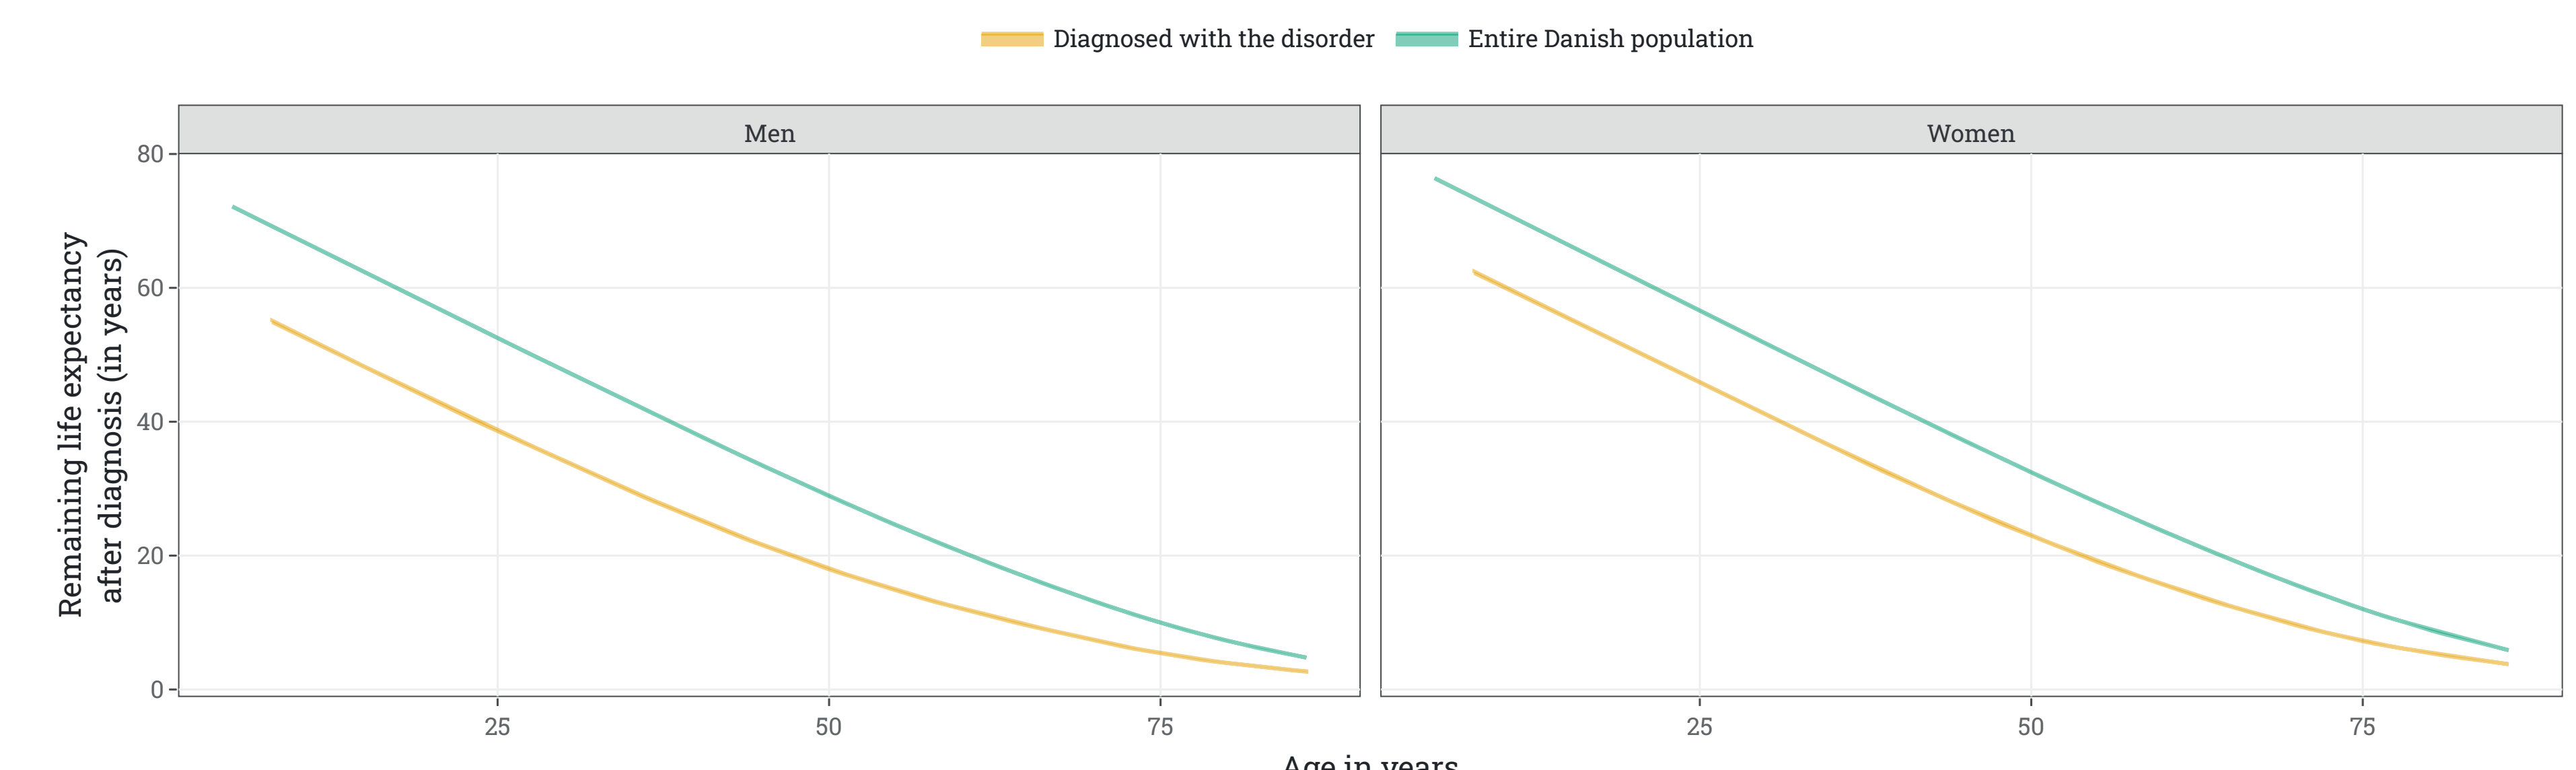

## Survival curves

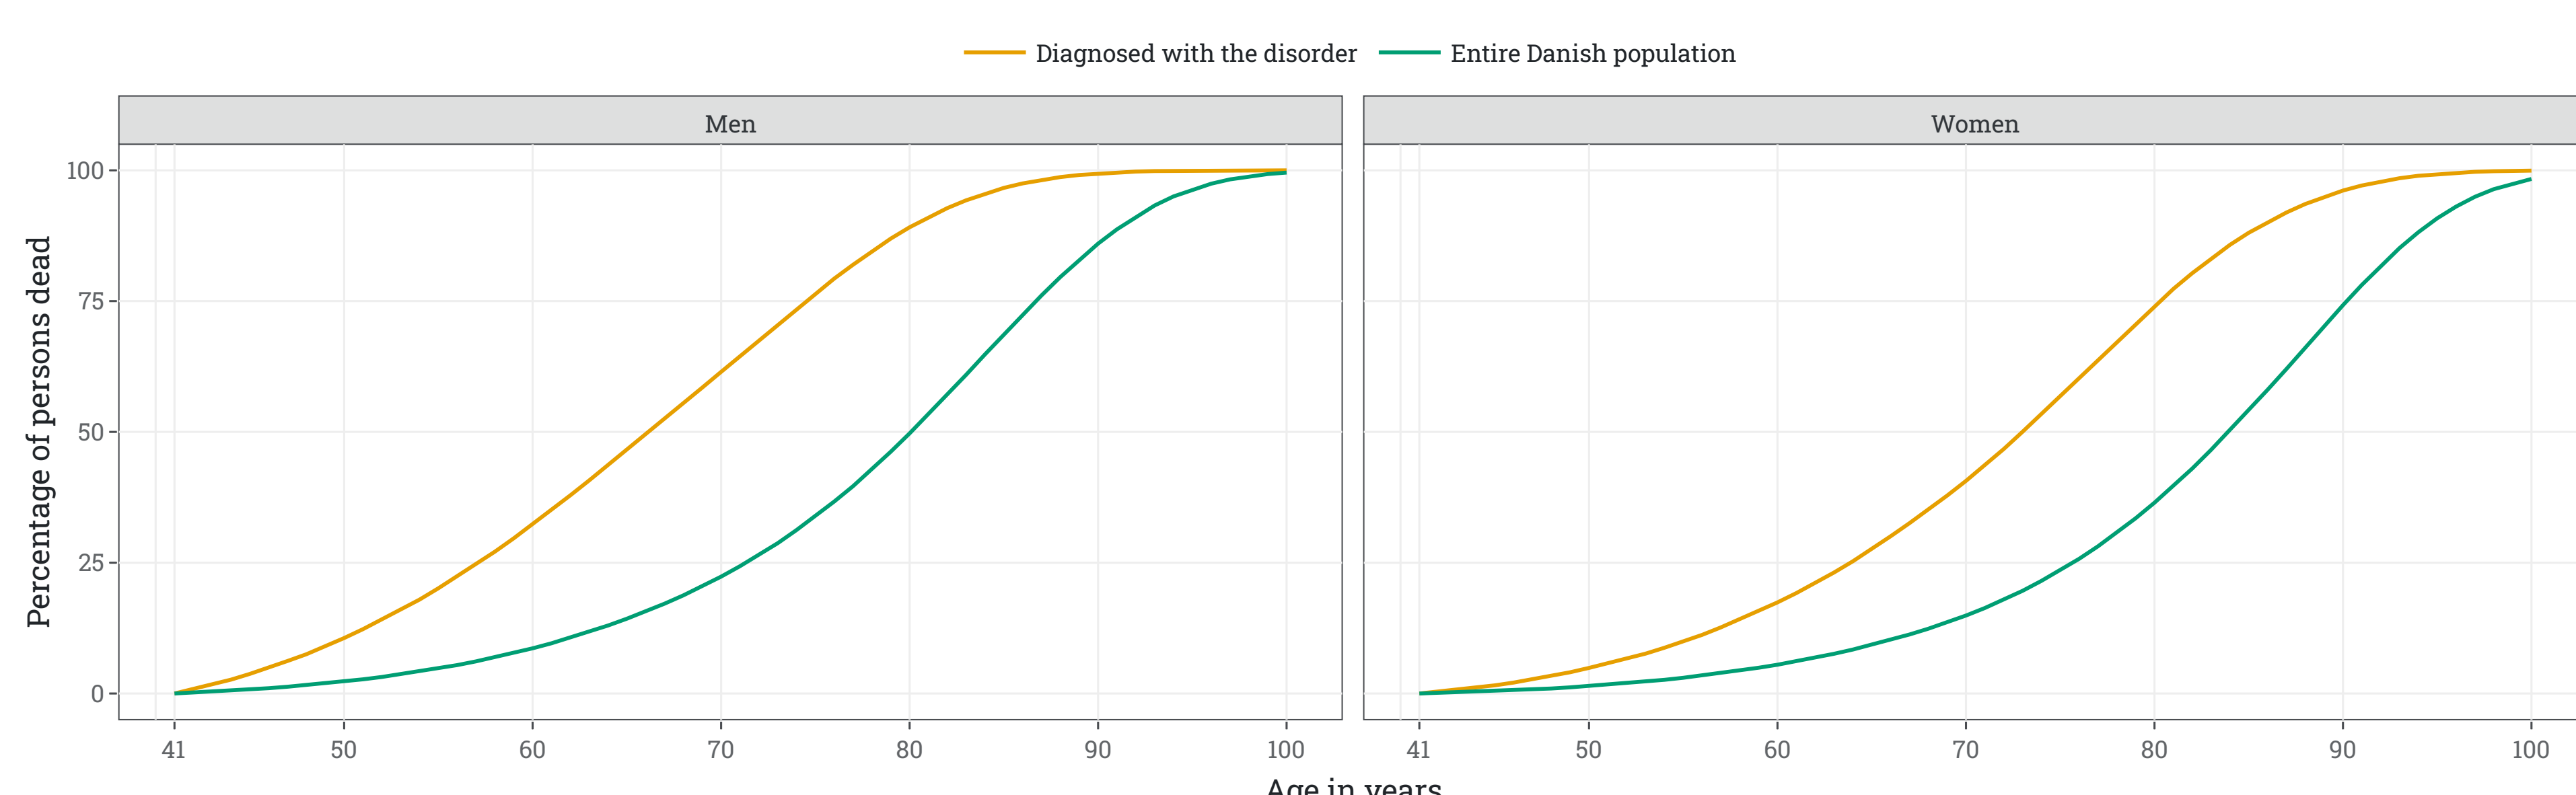

Starting age

41 years (50th percentile)

Estimates for all-causes of cause-specific mortality:

All causes

PAPER

PROTOCOL

CODE AND SUMMARY DATA

CONTACT

NBEPI.COM
