# Supplementary material for: Analysis of mortality metrics associated with a comprehensive range of disorders in Denmark, 2000 to 2018: A population-based cohort study
Source: PubMed Central journal article supplement (PMC9202944; doi:10.1371/journal.pmed.1004023), 2022-06-16

Adjusted for air pollution (black dot) Not adjusted (grey dot)

**Circulatory system**

- Hypertension
- Dislipidemia
- Ischemic heart disease
- Atrial fibrillation
- Heart failure
- Peripheral artery occlusive disease
- Stroke

**Endocrine system**

- Diabetes Mellitus
- Thyroid disorder
- Gout

**Pulmonary system and allergy**

- Chronic pulmonary disease
- Allergy

**Gastrointestinal system**

- Ulcer/chronic gastritis
- Chronic liver disease
- Inflammatory bowel disease
- Diverticular disease of intestine

**Urogenital system**

- Chronic kidney disease
- Prostate disorders

**Musculoskeletal system**

- Connective tissue disorders
- Osteoporosis

**Hematological system**

- HIV/AIDS
- Anemias

**Cancers**

**Neurological system**

- Vision problem
- Hearing problem
- Migraine
- Epilepsy
- Parkinson's disease
- Multiple sclerosis
- Neuropathies

**Mental disorders**

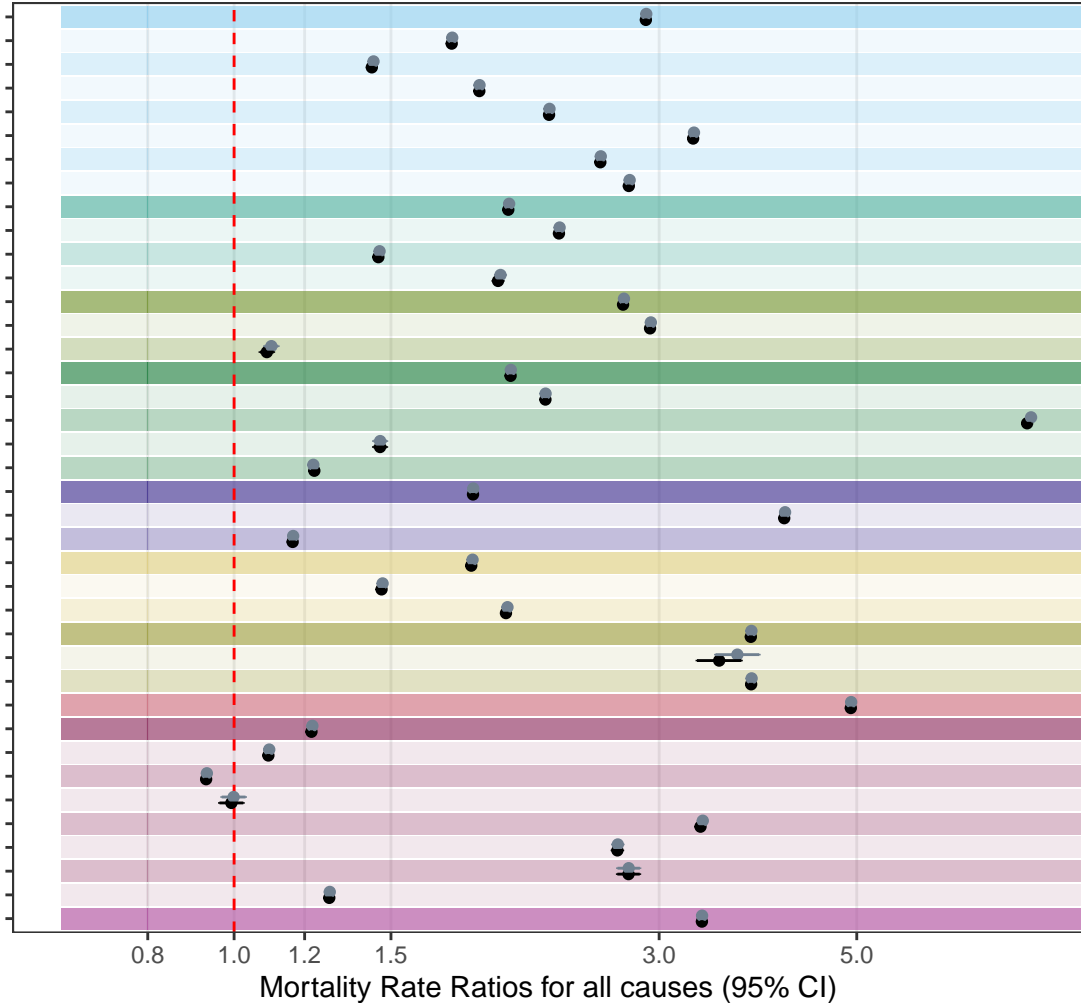

Supplement: pmed.1004023.s011.pdf [file pmed.1004023.s011.pdf]
