# Supplementary material for: Analysis of mortality metrics associated with a comprehensive range of disorders in Denmark, 2000 to 2018: A population-based cohort study
Source: PubMed Central journal article supplement (PMC9202944; doi:10.1371/journal.pmed.1004023), 2022-06-16

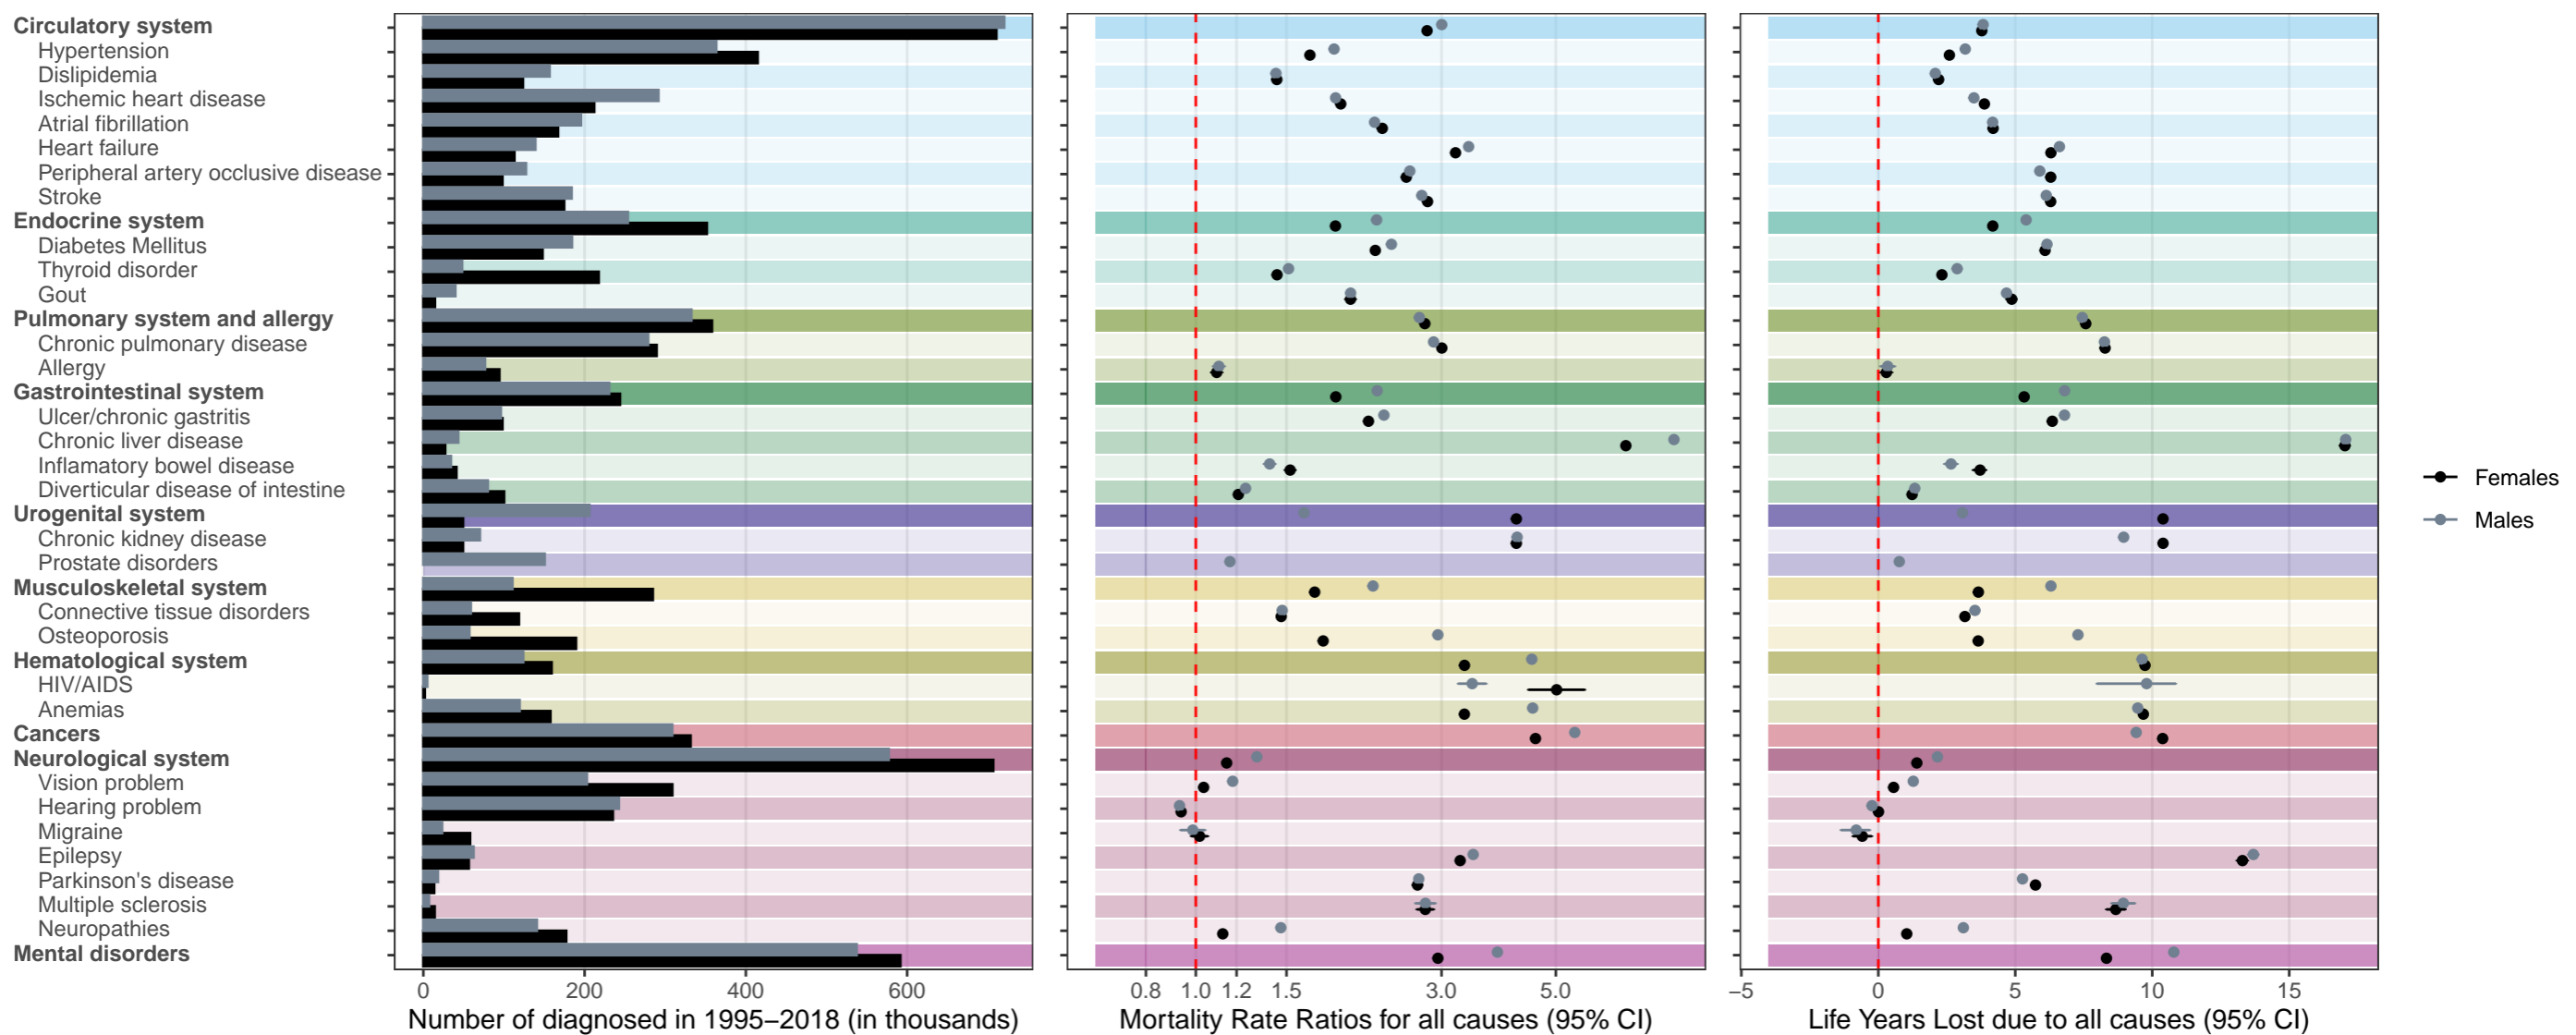

Supplement: pmed.1004023.s013.pdf [file pmed.1004023.s013.pdf]
